# Propofol Preferentially Relaxes Neurokinin Receptor-2-induced Airway Smooth Muscle Contraction in Guinea Pig Trachea

Neil R. Gleason, M.D.,\* George Gallos, M.D.,§ Yi Zhang, M.D.,† Charles W. Emala, M.D.‡

## ABSTRACT

**Background:** Propofol is the anesthetic of choice for patients with reactive airway disease and is thought to reduce intubation- or irritant-induced bronchoconstriction by decreasing the cholinergic component of vagal nerve activation. However, additional neurotransmitters, including neurokinins, play a role in irritant-induced bronchoconstriction. We questioned the mechanistic assumption that the clinically recognized protective effect of propofol against irritant-induced bronchoconstriction during intubation was due to attenuation of airway cholinergic reflexes.

**Methods:** Muscle force was continuously recorded from isolated guinea pig tracheal rings in organ baths. Rings were subjected to exogenous contractile agonists (acetylcholine, histamine, endothelin-1, substance P, acetyl-substance P, and neurokinin A) or to electrical field stimulation (EFS) to differentiate cholinergic or nonadrenergic, noncholinergic nerve-mediated contraction with or without cumulatively increasing concentrations of propofol, thiopental, etomidate, or ketamine.

**Results:** Propofol did not attenuate the cholinergic component of EFS-induced contraction at clinically relevant concentrations. In contrast, propofol relaxed nonadrenergic, noncholinergic-mediated EFS contraction at concentrations within the clinical range (20–100  $\mu\text{M}$ ,  $n = 9$ ;  $P < 0.05$ ), and propofol was more potent against an exogenous selective

neurokinin-2 receptor *versus* neurokinin-1 receptor agonist contraction ( $n = 6$ ,  $P < 0.001$ ).

**Conclusions:** Propofol, at clinically relevant concentrations, relaxes airway smooth muscle contracted by nonadrenergic, noncholinergic-mediated EFS and exogenous neurokinins but not contractions elicited by the cholinergic component of EFS. These findings suggest that the mechanism of protective effects of propofol against irritant-induced bronchoconstriction involves attenuation of tachykinins released from nonadrenergic, noncholinergic nerves acting at neurokinin-2 receptors on airway smooth muscle.

## What We Already Know about This Topic

- ❖ Propofol is preferred for anesthetic induction in patients with reactive airway disease. The presumed protection of propofol against bronchoconstriction has been decreased airway parasympathetic nerve acetylcholine release

## What This Article Tells Us That Is New

- ❖ In guinea pig tracheal rings, clinically relevant concentrations of propofol did not block tracheal smooth muscle contraction by parasympathetic nerve acetylcholine release but did attenuate contraction by stimulated nonadrenergic, noncholinergic nerve neurotransmitter release, specifically neurokinin A

PROPOFOL is recognized as the preferred intravenous anesthetic agent in patients with reactive airway disease requiring intubation, an event that can induce irritant-mediated reflex bronchoconstriction.<sup>1</sup> The presumed mechanism of airway protection by propofol involves the attenuation of parasympathetic nerve acetylcholine release: the assumed mechanism of irritant-induced bronchoconstriction.<sup>2–4</sup> Supraclinical concentrations of propofol are required to block agonists directly contracting airway smooth muscle, which has lent support to this presumed neural cholinergic mechanism. Although propofol is known to act, in part, by potentiating endogenous  $\gamma$ -aminobutyric acid action at  $\gamma$ -aminobutyric acid receptors type A on airway smooth muscle,<sup>5</sup> direct airway smooth muscle effects of propofol at concentrations above those achieved clinically have been attributed to modulation of L-type calcium channels<sup>6</sup> and inositol phosphate signaling.<sup>7–9</sup> Studies suggesting a vagal nerve-mediated mechanism for propofol have made

\* Assistant Professor, Department of Anesthesiology, Dartmouth Hitchcock Medical Center, Lebanon, New Hampshire, § Assistant Professor, † Research Assistant, ‡ Professor, Department of Anesthesiology, College of Physicians and Surgeons, Columbia University, New York, New York.

Received from the Department of Anesthesiology, Columbia University, New York, New York. Submitted for publication July 13, 2009. Accepted for publication January 5, 2010. Intramural support from the Department of Anesthesiology, Columbia University, College of Physicians and Surgeons, New York, New York, and the National Institutes of Health (GMS GM065281), Bethesda, Maryland.

Address correspondence to Dr. Gleason: Department of Anesthesiology, Dartmouth Hitchcock Medical Center, One Medical Center Drive, Lebanon, New Hampshire 03756. neil.r.gleason@hitchcock.org. Information on purchasing reprints may be found at [www.anesthesiology.org](http://www.anesthesiology.org) or on the masthead page at the beginning of this issue. ANESTHESIOLOGY's articles are made freely accessible to all readers, for personal use only, 6 months from the cover date of the issue.

two important and perhaps incorrect assumptions of irritant-induced bronchoconstriction: (1) cholinergic nerves are the primary airway efferent nerve and (2) acetylcholine is the primary agonist.

Cholinergic irritant-induced bronchoconstriction is mediated by an irritant-activated afferent fiber signaling to the central nervous system to stimulate cholinergic outflow along the vagus nerve contracting airway smooth muscle *via* released acetylcholine acting at M3 muscarinic receptors. However, additional irritant-sensing afferent nerves are present in the airway. Nonadrenergic, noncholinergic (NANC) nerves are composed of the following three groups of airway afferent nerves: (1) unmyelinated nociceptive C fibers, (2) rapidly adapting or irritant mechanoreceptors, and (3) slowly adapting stretch receptors differentiated by airway location, physiochemical sensitivity, neurochemistry, and conduction velocities.<sup>10–13</sup> Stimulated NANC nerves induce bronchoconstriction in animals and humans by liberated neurotransmitters (*e.g.*, tachykinins).<sup>14–18</sup> Tachykinins have multiple effects in airways, including bronchoconstriction, hyperemia, microvascular hyperpermeability, and mucus secretion by affecting airway smooth muscle, mucosal vasculature, submucosal glands, and mast cells through Gq-coupled neurokinin receptors with subtypes 1, 2, and 3.

In this study, we questioned the mechanistic presumption that propofol preferentially relaxes irritant-induced bronchoconstriction by attenuating the activity of efferent parasympathetic cholinergic nerves. To address this mechanistic question, we studied whether propofol was more effective than thiopental, etomidate, or ketamine in attenuating constriction of guinea pig airway smooth muscle *in vitro* contracted by cholinergic or NANC neurotransmitter-mediated electrical field stimulation (EFS) of nerves and the exogenous contractile agonists acetylcholine, histamine, endothelin-1, substance P, acetyl-substance P, and neurokinin A.

## Materials and Methods

### Guinea Pig Tracheal Rings in Organ Baths

All studies were approved by the Columbia University Institutional Animal Care and Use Committee (New York, New York). Hartley male guinea pigs (400 g) were anesthetized by 50 mg intraperitoneal pentobarbital. Tracheas were promptly removed and dissected into two closed cartilaginous ring units with mucosa, connective tissue, and epithelium removed and attached to a fixed tissue hook in a 2-ml bath (Radnoti Glass Technology, Inc., Monrovia, CA) and a Grass FT03 force transducer (Grass Telefactor, West Warwick, RI), using silk threads as previously described.<sup>19</sup> BioPac hardware and Acknowledge 3.7.3 software (Biopac Systems, Inc., Goleta, CA) continuously digitally recorded muscle force throughout all experiments. Rings were equilibrated at 1 g of isotonic force for 1 h with Krebs–Henseleit buffer<sup>19</sup> (with 10  $\mu$ M indomethacin, pH 7.4, 37°C) replaced every 15 min in buffer continuously bubbled with 95% O<sub>2</sub> and 5% CO<sub>2</sub>.

One tracheal ring was used for a single contractile agonist and intravenous anesthetic. Each experiment used a contrac-

tile stimulus previously demonstrated to provide a sustained response before the addition of cumulatively increasing concentrations of an intravenous anesthetic to the organ baths. In addition, all responses were compared with rings in parallel organ baths exposed to the same contractile protocol without intravenous anesthetic exposure to ensure that changes in contracted tone reflected intravenous anesthetic rather than spontaneous decay of contracted tone and thus functioned as contractile stimuli time controls. All responses were measured as the difference between the peak muscle force before an intravenous anesthetic and peak muscle force after intravenous anesthetic.

**Cholinergic and NANC EFS.** Tracheal rings were contracted with cumulatively increasing concentrations of acetylcholine (0.1–100  $\mu$ M) twice before resting tension was reestablished at 1 g, and either 10  $\mu$ M thiorphan (acetylcholine experiments) or 1  $\mu$ M atropine (NANC experiments) was added to the baths. Ten-second trains of square wave direct current EFS (30–50 Hz, 24 V, 0.5 ms pulse width) every 80 s to 20 min were applied through platinum electrodes built into the organ baths. These electrical stimuli induced a contractile response with two distinct components previously characterized: a rapid cholinergic contraction followed by a more slowly developing contraction classic for excitatory (procontractile) NANC contractions.<sup>20,21</sup> Once consistent repetitive contractile responses were obtained, cumulatively increasing concentrations of propofol (0.5–100  $\mu$ M), thiopental (0.5–200  $\mu$ M), ketamine (0.5–50  $\mu$ M), or etomidate (0.008–16  $\mu$ M) were added to the baths.

**Exogenous Acetylcholine.** Rings were contracted with 1–1.5  $\mu$ M acetylcholine until three consistent sustained contractions were achieved. Then, propofol (0.5–100  $\mu$ M), thiopental (0.5–200  $\mu$ M), ketamine (0.5–50  $\mu$ M), and etomidate (0.008–16  $\mu$ M) were added to the baths after a sustained contraction to exogenous acetylcholine.

**Exogenous Histamine.** Rings were contracted with 1–10  $\mu$ M histamine and then washed as above until three consistent sustained contractions were achieved. Then, propofol (0.5–100  $\mu$ M) or thiopental (0.5–200  $\mu$ M) was added to the baths after a sustained contraction to exogenous histamine was established.

**Exogenous Endothelin-1.** Tracheal rings were contracted with a single concentration (1  $\mu$ M) of endothelin-1 before cumulatively increasing concentrations of propofol (0.5–100  $\mu$ M) or thiopental (0.5–200  $\mu$ M) were added to the baths after attainment of a stable contraction.

**Exogenous Substance P.** Tracheal rings were contracted with a single concentration (1–5  $\mu$ M) of substance P, and after the attainment of a stable contraction, cumulatively increasing concentrations of propofol (0.5–100  $\mu$ M) or thiopental (0.5–200  $\mu$ M) were added to the baths. In a separate group of experiments, tracheal rings were pretreated with compound 48/80 (815 mM) and *N*-vanillylnonanamide (10  $\mu$ M) to deplete mast cells and NANC nerves of neurotransmitters, respectively. In preliminary studies, tracheal rings contracted with either *N*-vanillylnonanamide or compound

48/80 did not contract to a second exposure, confirming the successful depletion of neurotransmitters. After the attainment of a stable contraction in response to substance P, cumulatively increasing concentrations of propofol or thiopental were added as mentioned earlier.

**Exogenous Acetyl-Substance P or Neurokinin A.** Tracheal rings were contracted with a single concentration (0.1  $\mu\text{M}$ ) of the neurokinin-1 receptor-selective agonist acetyl-substance P or the neurokinin-2 receptor agonist neurokinin A. After the attainment of a stable contraction for 5 min in response to acetyl-substance P or neurokinin A, cumulatively increasing concentrations of propofol (20–100  $\mu\text{M}$ ) were added as mentioned earlier with continuous digital recording of muscle force.

### Reagents

Propofol (ICN Biomedicals, Costa Mesa, CA) and thiopental (Sigma-Aldrich, St. Louis, MO) were diluted in dimethyl sulfoxide (Fisher Scientific, Waltham, MA) before further dilution in water such that final dimethyl sulfoxide concentration in the bath did not exceed 0.1%. Etomidate (Hospira, Lake Forest, IL) in propylene glycol was diluted in water such that the final concentration of propylene glycol did not exceed 0.2%. Acetyl-substance P, atropine, histamine, ace-

tylcholine, endothelin-1, compound 48/80, indomethacin, and thiopran were purchased from Sigma-Aldrich. Ketamine and pentobarbital were purchased from Henry Schein Veterinary Co. (Indianapolis, IN). Neurokinin A, tetrodotoxin, and substance P (Calbiochem, San Diego, CA) were suspended in acetic acid and diluted with buffer with no change in the final pH.

### Statistical Analysis

All statistical analyses were conducted using Graphpad Instat 3.01 software (GraphPad Software, Inc., San Diego, CA) using repeated-measure two-way ANOVA with a *post hoc* Student *t* test with Bonferroni correction for multiple comparisons with statistical significance set at  $P < 0.05$ . All *P* values were two-tailed. In all experiments, *n* is the number of individual tracheal rings studied. All results are presented as mean  $\pm$  SEM.

## Results

### Intravenous Anesthetic Relaxation of EFS-induced Tracheal Ring Contractions

Guinea pig tracheal rings were contracted by EFS using electrical parameters and pretreatments to allow the distinction between cholinergic (postganglionic parasympathetic nerve

## Electrical Field Stimulated-Cholinergic Release

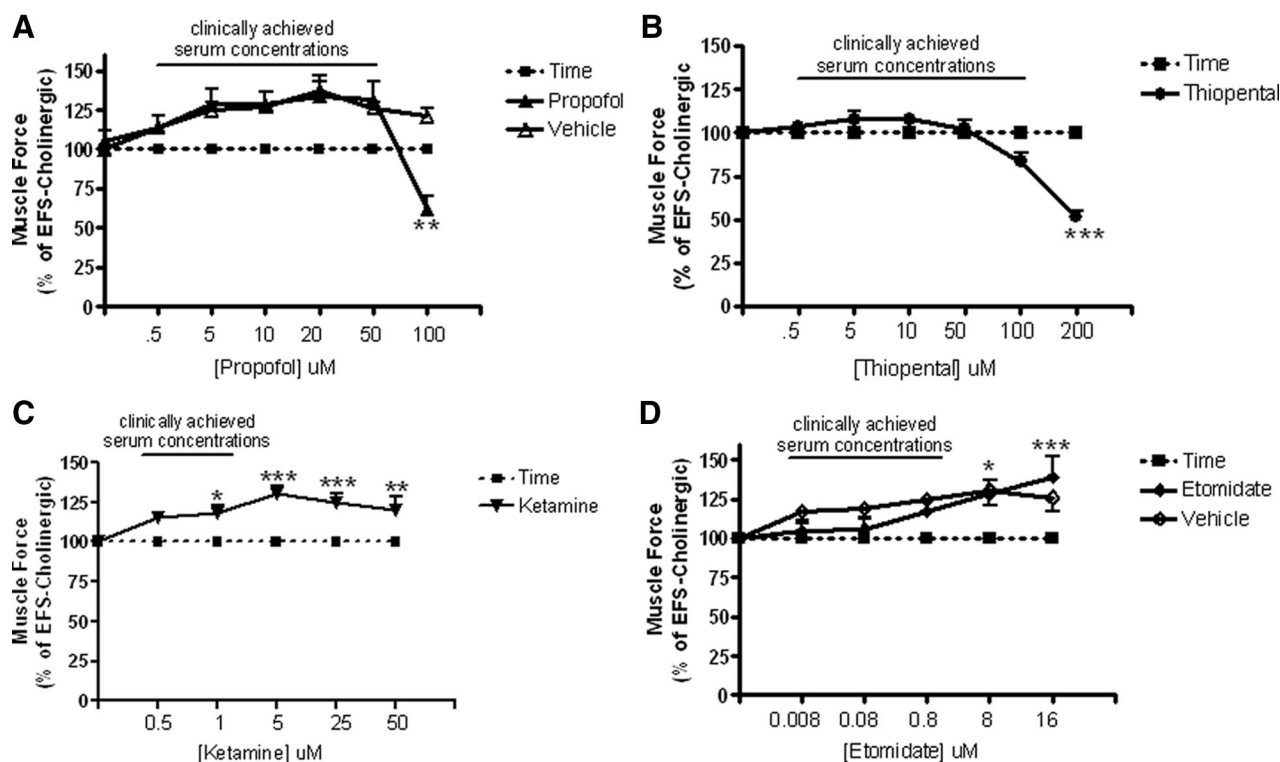

**Fig. 1.** Guinea pig tracheal ring muscle force generated in response to cholinergic electrical field-stimulated (EFS) contraction expressed as percent change from baseline contraction and response to the addition of intravenous anesthetics to the organ bath. (A) Propofol, 0.5–100  $\mu\text{M}$  ( $n = 8$ ); (B) thiopental, 0.5–200  $\mu\text{M}$  ( $n = 8$ ); (C) ketamine, 0.5–50  $\mu\text{M}$  ( $n = 8$ ); (D) etomidate, 0.008–16  $\mu\text{M}$  ( $n = 8$ ). \*  $P < 0.05$ , \*\*  $P < 0.01$ , \*\*\*  $P < 0.001$ . Data are presented as mean  $\pm$  SEM. No intravenous anesthetic relaxed cholinergic EFS-induced contraction at clinically relevant concentrations.

## Electrical Field Stimulated-Non-Adrenergic, Non-Cholinergic Release

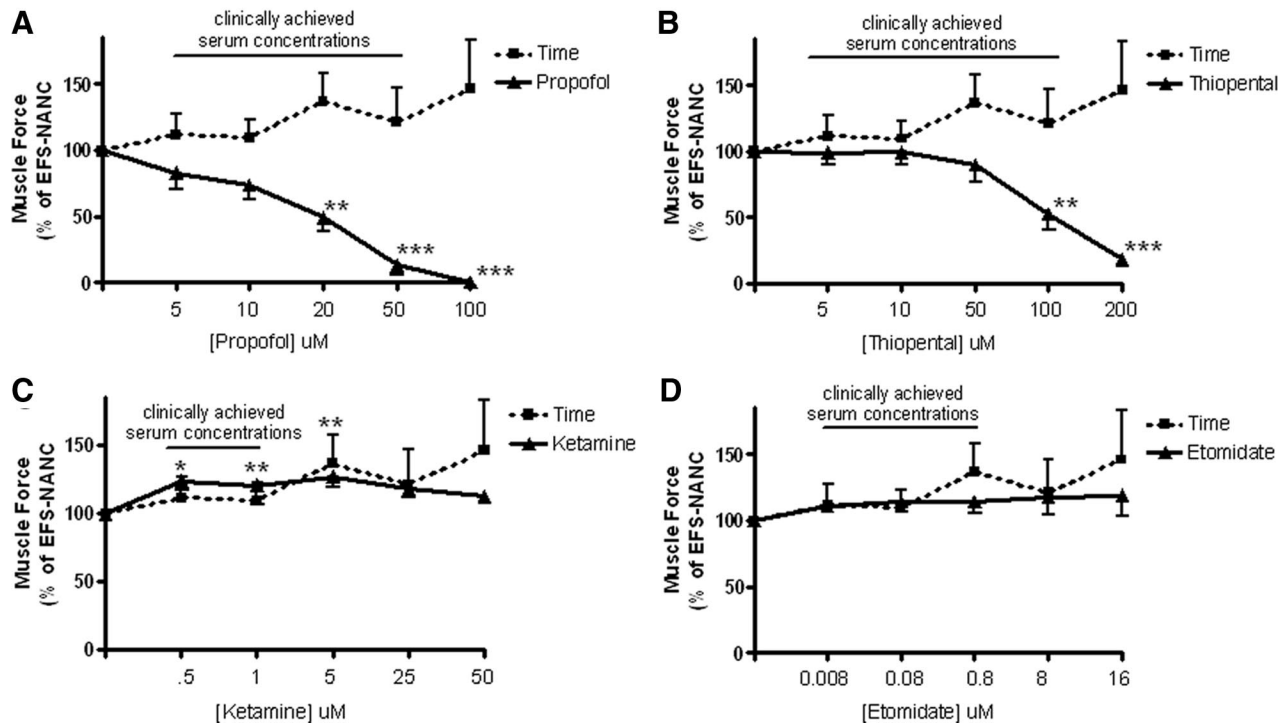

**Fig. 2.** Guinea pig tracheal ring muscle force generated in response to nonadrenergic, noncholinergic (NANC) electrical field-stimulated (EFS) contraction expressed as percent change from baseline contraction and response to the addition of intravenous anesthetics to the organ bath. (A) Propofol, 5–100  $\mu\text{M}$  ( $n = 9$ ); (B) thiopental 5–200  $\mu\text{M}$  ( $n = 8$ ); (C) ketamine, 0.5–50  $\mu\text{M}$  ( $n = 11$ ); (D) etomidate, 0.008–16  $\mu\text{M}$  ( $n = 10$ ). \*  $P < 0.05$ , \*\*  $P < 0.01$ , \*\*\*  $P < 0.001$ . Data are presented as mean  $\pm$  SEM. Only propofol relaxed NANC EFS-induced contraction at clinically relevant concentrations.

release of acetylcholine) or NANC (C-fiber release of tachykinins) contractions. None of the intravenous anesthetics under study (propofol, thiopental, etomidate, or ketamine) in clinically relevant concentrations relaxed the cholinergic component of EFS-induced contraction (fig. 1,  $n = 8$  per anesthetic). Dimethyl sulfoxide (0.1%) and propylene glycol (0.2%) vehicle controls for propofol and etomidate, respectively, neither had significant effect on baseline tone nor induced contractions (data not shown).

In contrast, clinically relevant concentrations of propofol relaxed the NANC component of EFS-induced contraction mediated by tachykinins ( $n = 9$ , 20  $\mu\text{M}$ ,  $P < 0.01$ ; 50–100  $\mu\text{M}$ ,  $P < 0.001$ ; fig. 2A). Thiopental caused significant relaxation only at the high end of concentrations achieved clinically ( $n = 8$ , 100  $\mu\text{M}$ ,  $P < 0.01$ ; 200  $\mu\text{M}$ ,  $P < 0.001$ ; fig. 2B). Neither ketamine nor etomidate relaxed NANC EFS-induced contraction ( $n = 11$ , fig. 2C, and  $n = 10$ , fig. 2D, respectively). Ketamine induced a small but significant potentiation of NANC contractions in clinically relevant concentrations (0.5  $\mu\text{M}$ ,  $P < 0.05$ ; 1–5  $\mu\text{M}$ ,  $P < 0.01$ ; fig. 2C).

#### Intravenous Anesthetic Relaxation of Exogenous Agonist-induced Contractions

In agreement with our cholinergic EFS data, propofol was less effective than thiopental, with only the highest

concentration of propofol considered clinically relevant (50  $\mu\text{M}$ ) attenuating acetylcholine-induced contractions ( $n = 10$ ,  $P < 0.05$ , 50  $\mu\text{M}$ ;  $P < 0.001$ , 100  $\mu\text{M}$ ; fig. 3A). Thiopental concentration dependently relaxed exogenous acetylcholine-induced contractions well within clinically relevant concentrations ( $n = 11$ , 10–200  $\mu\text{M}$ ,  $P < 0.001$ ; fig. 3B). Ketamine ( $n = 5$ ; fig. 3C) and etomidate ( $n = 5$ ; fig. 3D) were without significant effects on the acetylcholine-induced contraction at clinically relevant concentrations.

Consistent with our NANC EFS findings, propofol, but not thiopental, etomidate, or ketamine, relaxed an exogenous substance P-induced contraction within clinically relevant concentrations ( $n = 12$ , 20  $\mu\text{M}$ ,  $P < 0.05$ ; 50–100  $\mu\text{M}$ ,  $P < 0.001$ ; fig. 4A). Thiopental relaxed substance P-induced contractions only at a concentration above those considered clinically relevant (200  $\mu\text{M}$ ,  $n = 11$ ,  $P < 0.001$ ; fig. 4B). Neither ketamine nor etomidate significantly relaxed an exogenous substance P-induced contraction (figs. 4C and 4D, respectively).

After the depletion of endogenous tachykinins from NANC nerves by capsaicin and histamine from mast cells with compound 48/80, propofol was still more effective than thiopental at relaxing substance P-induced contractions, confirming that this preferential effect of propofol



## Exogenous Acetylcholine-Induced Contractions

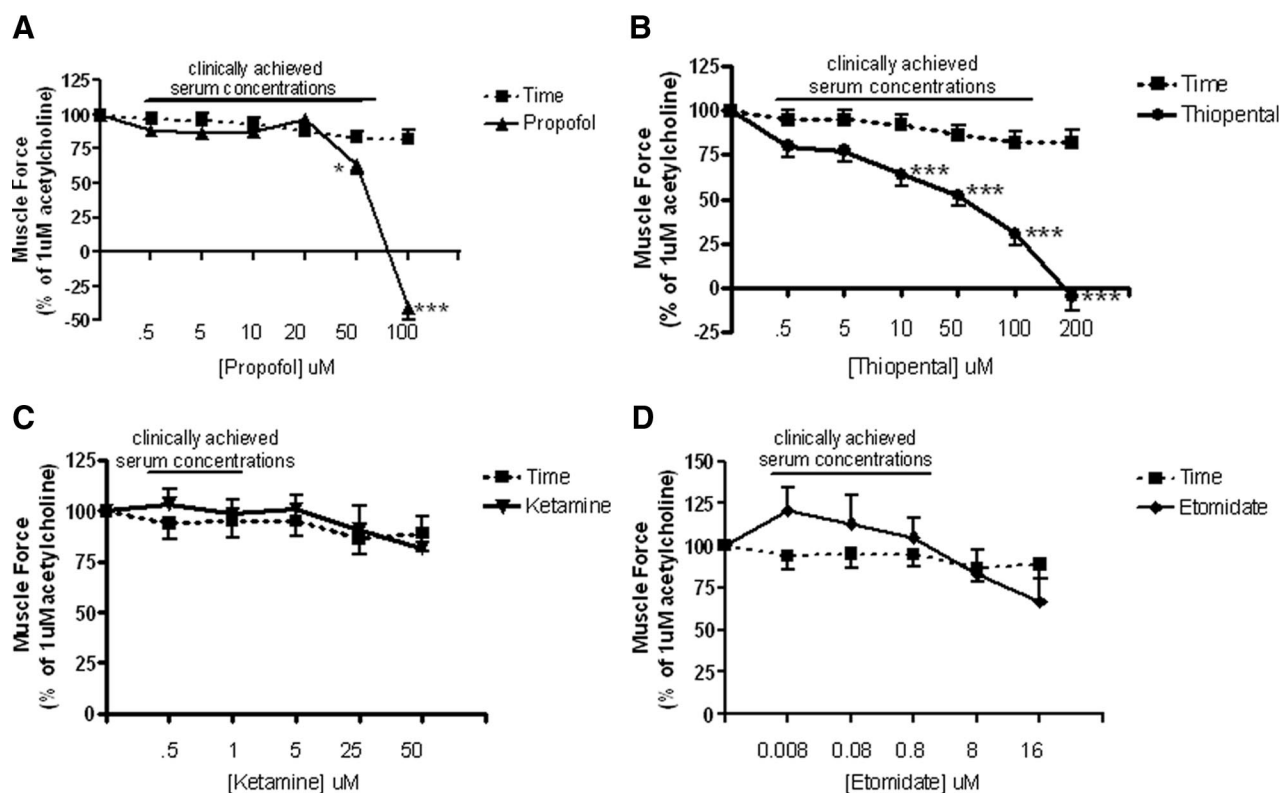

**Fig. 3.** Guinea pig tracheal ring muscle force generated in response to exogenous acetylcholine-induced contraction expressed as percent change from baseline peak contraction and response to the addition of intravenous anesthetics to the organ bath. (A) Propofol, 0.5–100  $\mu\text{M}$  ( $n = 10$ ); (B) thiopental, 0.5–200  $\mu\text{M}$  ( $n = 11$ ); (C) ketamine, 0.5–50  $\mu\text{M}$  ( $n = 5$ ); (D) etomidate, 0.008–16  $\mu\text{M}$  ( $n = 5$ ). \*  $P < 0.05$ , \*\*\*  $P < 0.001$ . Data are presented as mean  $\pm$  SEM. Only thiopental relaxed exogenous acetylcholine-induced contraction at concentrations routinely reached clinically.

was at the level of the airway smooth muscle ( $n = 4$ , 20–100  $\mu\text{M}$ ; fig. 5).

Additional studies were performed in tracheal rings contracted with the NK1-selective agonist acetyl-substance P or the NK2-selective agonist neurokinin A. Propofol at concentrations considered above the clinical range (100  $\mu\text{M}$ ) relaxed both NK1- and NK2-induced contractions; however, propofol significantly attenuated only a NK2-induced contraction at concentrations well within the clinically achieved range (50  $\mu\text{M}$ ,  $P < 0.001$  for NK2 compared with NK1 relaxation,  $n = 6$ ; fig. 6).

Histamine- (1–10  $\mu\text{M}$ ) and endothelin-1 (1  $\mu\text{M}$ )-induced contractions were sustained for shorter periods of time compared with contractions induced with acetylcholine or substance P. Spontaneous relaxation of histamine- or endothelin-1-induced contractions was not increased by clinically achieved concentrations of propofol or thiopental ( $n = 9$  for each drug against each contractile agonist; fig. 7).

### Discussion

Our primary finding is that clinically relevant concentrations of propofol selectively and uniquely inhibited isolated guinea pig airway smooth muscle contraction induced by selective

neurokinin-2 receptor activation and the NANC nerve component of EFS. None of the intravenous anesthetics tested (propofol, thiopental, etomidate, or ketamine) relaxed cholinergic-mediated EFS-induced contraction of airway smooth muscle. Thiopental was more effective than propofol at relaxing exogenous acetylcholine-induced contractions. These findings conflict with the accepted assumptions that the mechanism of preferential protection from irritant-induced bronchoconstriction during intubation by propofol is attenuation of cholinergic nerve acetylcholine release and that irritant-induced vagal nerve acetylcholine release is the predominant mediator of bronchospasm by tracheal intubation.

Interpretation of these findings must account for the relative concentrations of intravenous anesthetics achieved in the airway tissue after bolus administration before irritation of the upper airway during endotracheal tube intubation. The measurement of plasma propofol concentrations during clinical administration is complex, and the concentration of intravenous anesthetics present at the tissue in airways after induction doses is unknown, but serum concentrations allow for a relative comparison. Induction doses of propofol (2–3 mg/kg intravenously) result in peak plasma concentrations of 60–80  $\mu\text{M}$ ,<sup>8,9,22</sup> whereas maintenance infusions of propo-

## Exogenous Substance P Induced Contractions

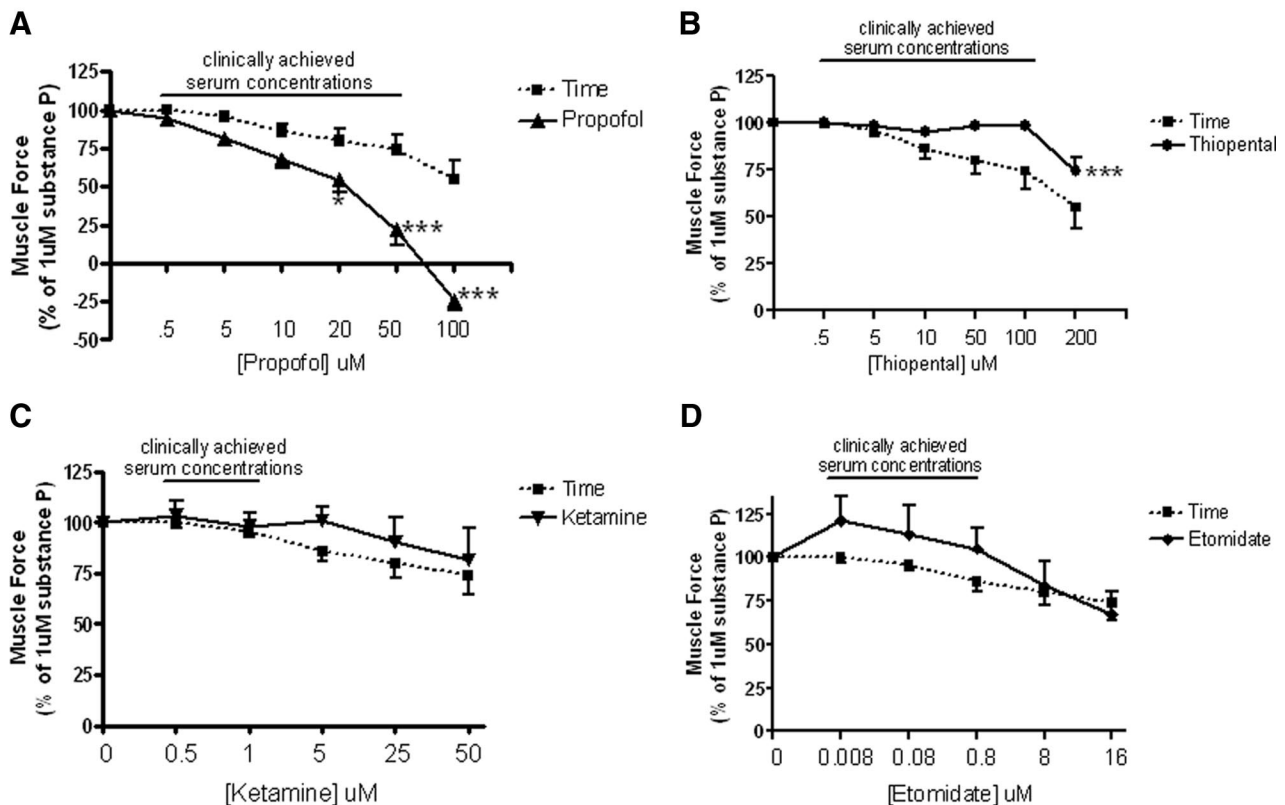

**Fig. 4.** Guinea pig tracheal ring muscle force generated in response to exogenous substance P-induced contraction expressed as percent change from peak contraction and response to the addition of intravenous anesthetics to the organ bath. (A) Propofol, 0.5–100  $\mu\text{M}$  ( $n = 12$ ); (B) thiopental, 0.5–200  $\mu\text{M}$  ( $n = 11$ ); (C) ketamine, 0.5–50  $\mu\text{M}$  ( $n = 10$ ); (D) etomidate, 0.008–16  $\mu\text{M}$  ( $n = 10$ ). \*  $P < 0.05$ , \*\*\*  $P < 0.001$ . Data are presented as mean  $\pm$  SEM. Only propofol relaxed exogenous substance P-induced contraction at concentrations reached clinically.

fol reportedly achieve approximately 30  $\mu\text{M}$  concentrations.<sup>23–26</sup> Although the concentration in individual tissue compartments is unknown, high tissue uptake of propofol by the lung (30% of bolus dose) has been reported.<sup>27</sup> A large percentage of propofol is protein-bound, although the fraction of free drug actually increases at lower concentrations. This would lessen the potential error in our concentration calculations that are performed in the absence of protein binding in buffer in organ baths.<sup>28</sup> The peak serum concentrations of etomidate, thiopentone, and ketamine after anesthetic induction are reported to be 5, 25, and 6  $\mu\text{M}$ , respectively.<sup>29,30</sup>

Many studies in humans and animal airway tissue models demonstrate propofol attenuation of acetylcholine,<sup>2,31,32</sup> histamine,<sup>33</sup> and endothelin-1 contractile responses<sup>2</sup> but only at propofol concentrations above those achieved clinically (100–300  $\mu\text{M}$ ). Muscarinic receptor-mediated signaling coupled to L-type calcium channels,<sup>6</sup> intracellular calcium changes,<sup>33,34</sup> or inositol phosphate synthesis<sup>7</sup> has only been effected by high concentrations of propofol (> 100  $\mu\text{M}$ ). Calcium sensitivity in permeabilized canine tracheal smooth muscle cells in the absence or presence of muscarinic receptor activation was not affected by propofol even at con-

centrations of 270  $\mu\text{M}$ .<sup>35</sup> In dogs, propofol attenuated methacholine bronchoconstriction,<sup>36</sup> the neural component of histamine-induced bronchoconstriction,<sup>2</sup> and vagal nerve-induced bronchoconstriction<sup>4</sup> only at concentrations of 20 mg/kg (typical human induction dose is 2–3 mg/kg). Taken together, these studies have demonstrated that at clinically relevant concentrations, propofol does not have significant effects on cholinergic modulation of airway smooth muscle.

Conversely, in a sheep model, vagal nerve-induced bronchoconstriction has been shown to be more sensitive to low concentrations of propofol than cholinergic constriction mediated at the airway smooth muscle. Delivery of propofol *via* the bronchial artery to sheep resulted in attenuation of vagal nerve-induced bronchospasm at lower doses (300  $\mu\text{g}/\text{min}$ ) and attenuation of methacholine-induced bronchoconstriction only at doses (3 mg/min) believed to be above clinically relevant concentrations by these authors, perhaps suggesting relaxation of an NANC-induced constriction by their parameters.<sup>3,37</sup>

To confirm that the preferential relaxation of NANC mediated EFS-induced contraction by propofol is not confounded by other C fiber, mast cell, or epithelial cell media-

## Exogenous Substance P Contraction after depletion of Non-Adrenergic, Non-Cholinergic Neurotransmitters

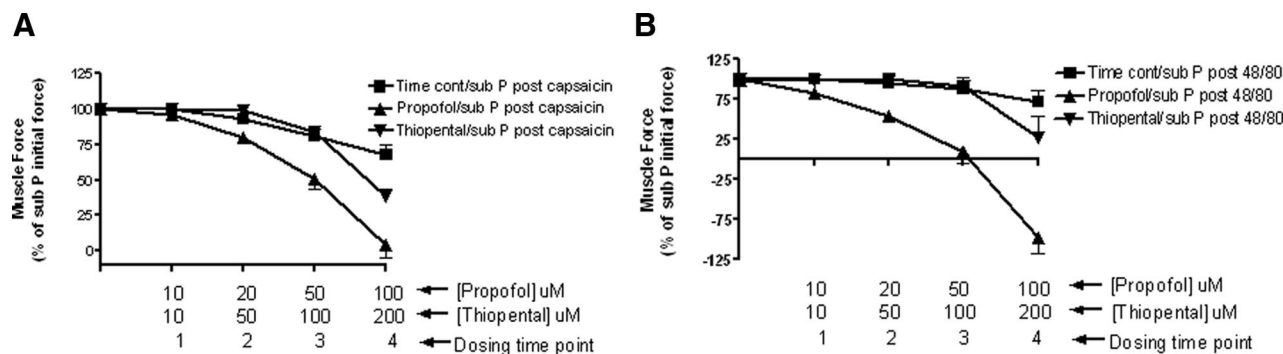

**Fig. 5.** Guinea pig tracheal ring muscle force generated in response to substance P expressed as percent change from peak contraction and response to intravenous anesthetics. (A) Propofol, 0.5–100  $\mu\text{M}$  ( $n = 4$ ), and thiopental, 10–200  $\mu\text{M}$  ( $n = 4$ ), versus substance P time control after C-fiber neurotransmitter depletion by capsaicin analog *N*-vanillylnonanamide, and (B) propofol, 10–100  $\mu\text{M}$  ( $n = 4$ ), and thiopental, 10–200  $\mu\text{M}$  ( $n = 4$ ), versus substance P time control after mast cell neurotransmitter depletion by compound 48/80. Only propofol causes significant relaxation of substance P-induced contraction after mast cell and nonadrenergic, noncholinergic nerve neurotransmitter depletion, suggesting a role for propofol-induced relaxation of substance P-induced contraction at the airway smooth muscle itself.

tors, epithelium-denuded guinea pig tracheal rings were contracted with exogenous substance P after depletion of C fiber and mast cell neurotransmitters. Again, propofol, but not thiopental, preferentially attenuated exogenous substance P contraction of airway smooth muscle. To further ensure that mast cell-derived neurotransmitters, that is, histamine or epithelial-derived products such as endothelin-1, were not secondary agonists inducing contraction, propofol and thiopental were given in an attempt to attenuate hista-

mine- and endothelin-1-induced contractions of airway smooth muscle but did not show any significant attenuation of these contractions.

Substance P activates NK1, NK2, and NK3 receptors. In an attempt to determine whether the preferential relaxation of neurokinin-mediated contraction by propofol could be linked to a specific neurokinin receptor subtype, further studies were conducted by contracting guinea pig tracheal rings with neurokinin receptor-1- and -2-specific agonists acetyl-substance P and neurokinin A, respectively. Although propofol, but not thiopental, relaxed both neurokinin receptor-1- and -2-mediated contractions at concentrations above the clinical range, propofol caused significant relaxation only at the neurokinin-2 receptor within the clinical range.

Although these findings do not discount the possibility that propofol decreases NANC nerve signaling, the effects of propofol were most clearly elucidated after nerve and mast cell neurotransmitter depletion in the presence of exogenous contractile agonists acting directly at the neurokinin-2 receptor on airway smooth muscle, suggesting that the protective effects of propofol against irritant-induced bronchoconstriction are mediated, at least in part, at the smooth muscle itself at propofol concentrations within the clinical range.

In this study, we have chosen to use guinea pig airway smooth muscle, in a well-established model of induced muscle contraction, because guinea pigs have exquisitely sensitive airways, comparable with the most brittle asthmatic with robust cholinergic and NANC responses both from EFS of retained airway nerves and in direct response to exogenous agonists. The current model measures *in vitro* muscle force as a surrogate for *in vivo* airway constriction. Our model is not specifically a model of irritation-induced bronchoconstriction.

### Exogenous Neurokinin-1 vs. Neurokinin-2 Receptor Selective Agonists

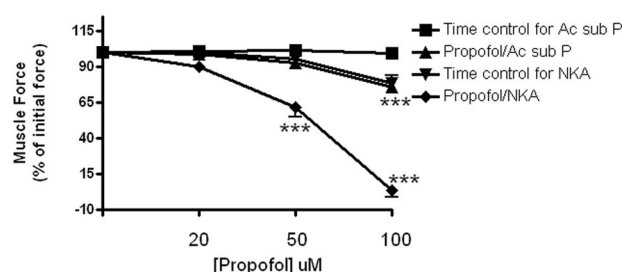

**Fig. 6.** Guinea pig tracheal ring muscle force generated by selective neurokinin-1 and neurokinin-2 receptor agonists acetyl-substance P (Ac sub P) and neurokinin A (NKA), respectively. Data expressed as percent change from peak contraction and response to 20–100  $\mu\text{M}$  propofol ( $n = 10$ ) versus acetyl-substance P and NKA. Data are expressed as mean  $\pm$  SEM. Although propofol relaxed both neurokinin-1 and -2 receptor-mediated contractions, only neurokinin-2-mediated contraction was relaxed at clinically relevant concentrations. Relaxation of neurokinin-2-specific agonist NKA suggests that the protective effect of propofol against reflex-induced bronchoconstriction is, at least in part, mediated by the neurokinin-2 receptor-mediated nonadrenergic, noncholinergic contraction. \*\*\*  $P < 0.001$ .

## Exogenous Histamine and Endothelin-1-Induced Contractions

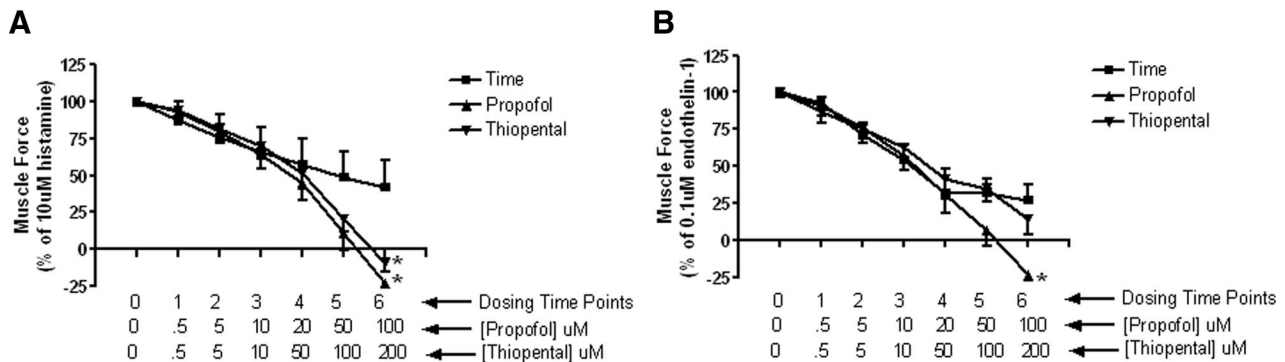

**Fig. 7.** Guinea pig tracheal ring muscle force generated by addition of exogenous histamine or endothelin-1. Data expressed as percent change from peak contraction and response to intravenous anesthetics. (A) Propofol, 0.5–100  $\mu\text{M}$  ( $n = 10$ ), and thiopental, 0.5–200  $\mu\text{M}$  ( $n = 10$ ), versus histamine-induced contraction time control, (B) propofol, 0.5–100  $\mu\text{M}$  ( $n = 10$ ), and thiopental, 0.5–200  $\mu\text{M}$  ( $n = 10$ ), versus endothelin-1-induced contraction time control. \*  $P < 0.05$ . Data are expressed as mean  $\pm$  SEM. Neither propofol nor thiopental relaxed either histamine- or endothelin-1-induced contractions at clinically relevant doses.

tion. However, our model does allow for EFS of the retained efferent nerves composing the irritant-induced reflex arc with separate discernible cholinergic and NANC contraction components. Moreover, this model allows for the exogenous administration of specific neurotransmitters known to be effectors of the cholinergic and NANC responses. It is likely that responses to individual neurotransmitter agonists vary between species, and it is likely that the guinea pig response to NANC neurotransmitters is more robust than that of humans.

However, several studies suggest a tachykinin-mediated contractile pathway in human smooth muscle, although its clinical relevance is not clearly demonstrated.<sup>38–40</sup> Unpublished data from our own laboratory using human trachea muscle strips in organ baths (Emala, CW. Columbia university College of Physicians and Surgeons, New York, New York; Data provided August 24, 2009) demonstrate robust contraction with both substance P- and the NK2-specific agonist  $\beta$ -alanine neurokinin A fragment 4–10, which is preferentially relaxed by propofol. Direct effects of tachykinins on airway smooth muscle have been demonstrated in several species, including human, acting on all the three known subtypes of neurokinin receptors (NK1, NK2, and NK3).<sup>38–40</sup> Interest in the role of tachykinins in patients with asthma<sup>41</sup> was initially stimulated by the findings that a tachykinin antagonist FK224 attenuated bradykinin-induced bronchoconstriction in asthmatics.<sup>42</sup> Isolated strips of human tracheal smooth muscle have been contracted with EFS that was not ablated by atropine or propranolol, suggesting NANC contraction.<sup>43</sup> Inhaled non-subtype-specific stimulants of NANC contraction, substance P, and capsaicin have decreased airflow measured by forced expiratory volume and sGaw in some studies.<sup>44–46</sup> The selective neurokinin receptor-2 agonist neurokinin A has been given to humans intravenously<sup>47</sup> and *via* inhalation<sup>48</sup> with decreases in airway flow measured by expiratory flow and sGaw, respectively.

More recently, interest in the role of tachykinins in asthma and chronic obstructive pulmonary disease<sup>49,50</sup> and the demonstration of a relationship between reactivity to methacholine and tachykinins in asthmatic airways<sup>51</sup> have led to recent studies demonstrating the effectiveness of dual<sup>52</sup> or triple<sup>53</sup> neurokinin subtype-specific antagonists in blocking neurokinin-induced bronchoconstriction in asthmatics. Taken together, these studies support a tachykinin-mediated contractile pathway in human airway smooth muscle and lend support to the relevance of the current studies in guinea pig airway smooth muscle to the human airway. Despite these important documented roles of tachykinins in bronchoconstriction and more specifically in irritant-induced bronchoconstriction, nothing is known about the interaction of intravenous anesthetics with tachykinins during a routine irritant to the upper airway: an endotracheal tube, and it is possible that the magnitude of NANC contraction in humans differs from the magnitude of NANC contraction in guinea pigs.

Our findings suggest that the mechanism of the protective effect of propofol on irritant-induced bronchoconstriction may be either by decreasing NANC nerve transmission or by attenuating the contractile effect of liberated tachykinins at the neurokinin 2 receptor on the airway smooth muscle itself.

## References

1. Pizov R, Brown RH, Weiss YS, Baranov D, Hennes H, Baker S, Hirshman CA: Wheezing during induction of general anesthesia in patients with and without asthma. A randomized, blinded trial. *ANESTHESIOLOGY* 1995; 82:1111–6
2. Hashiba E, Sato T, Hirota K, Hashimoto Y, Matsuki A: The relaxant effect of propofol on guinea pig tracheal muscle is independent of airway epithelial function and beta-adrenoceptor activity. *Anesth Analg* 1999; 89:191–6
3. Brown RH, Wagner EM: Mechanisms of bronchoprotection by anesthetic induction agents: Propofol *versus* ketamine. *ANESTHESIOLOGY* 1999; 90:822–8



4. Hashiba E, Hirota K, Suzuki K, Matsuki A: Effects of propofol on bronchoconstriction and bradycardia induced by vagal nerve stimulation. *Acta Anaesthesiol Scand* 2003; 47:1059-63
5. Gallos G, Gleason NR, Virag L, Zhang Y, Mizuta K, Whittington RA, Emala CW: Endogenous gamma-aminobutyric acid modulates tonic guinea pig airway tone and propofol-induced airway smooth muscle relaxation. *ANESTHESIOLOGY* 2009; 110:748-58
6. Yamakage M, Hirshman CA, Croxton TL: Inhibitory effects of thiopental, ketamine, and propofol on voltage-dependent  $Ca^{2+}$  channels in porcine tracheal smooth muscle cells. *ANESTHESIOLOGY* 1995; 83:1274-82
7. Lin CC, Shyr MH, Tan PP, Chien CS, Pan SL, Wang CC, Chiu CT, Yang CM: Mechanisms underlying the inhibitory effect of propofol on the contraction of canine airway smooth muscle. *ANESTHESIOLOGY* 1999; 91:750-9
8. Fan SZ, Yu HY, Chen YL, Liu CC: Propofol concentration monitoring in plasma or whole blood by gas chromatography and high-performance liquid chromatography. *Anesth Analg* 1995; 81:175-8
9. Conti G, Dell'Utri D, Vilardi V, De Blasi RA, Pelaia P, Antonelli M, Bufi M, Rosa G, Gasparetto A: Propofol induces bronchodilation in mechanically ventilated chronic obstructive pulmonary disease (COPD) patients. *Acta Anaesthesiol Scand* 1993; 37:105-9
10. Coleridge JC, Coleridge HM: Afferent vagal C fibre innervation of the lungs and airways and its functional significance. *Rev Physiol Biochem Pharmacol* 1984; 99:1-110
11. Kummer W, Fischer A, Kurkowski R, Heym C: The sensory and sympathetic innervation of guinea-pig lung and trachea as studied by retrograde neuronal tracing and double-labelling immunohistochemistry. *Neuroscience* 1992; 49:715-37
12. Ricco MM, Kummer W, Biglari B, Myers AC, Udem BJ: Interganglionic segregation of distinct vagal afferent fibre phenotypes in guinea-pig airways. *J Physiol* 1996; 496(Pt 2):521-30
13. Solway J, Leff AR: Sensory neuropeptides and airway function. *J Appl Physiol* 1991; 71:2077-87
14. Coleridge HM, Coleridge JC, Schultz HD: Afferent pathways involved in reflex regulation of airway smooth muscle. *Pharmacol Ther* 1989; 42:1-63
15. Fuller RW, Maxwell DL, Dixon CM, McGregor GP, Barnes VF, Bloom SR, Barnes PJ: Effect of substance P on cardiovascular and respiratory function in subjects. *J Appl Physiol* 1987; 62:1473-9
16. Lee LY, Pisarri TE: Afferent properties and reflex functions of bronchopulmonary C-fibers. *Respir Physiol* 2001; 125:47-65
17. Sant'Ambrogio G, Widdicombe J: Reflexes from airway rapidly adapting receptors. *Respir Physiol* 2001; 125:33-45
18. Sheppard MN, Polak JM, Allen JM, Bloom SR: Neuropeptide tyrosine (NPY): A newly discovered peptide is present in the mammalian respiratory tract. *Thorax* 1984; 39:326-30
19. Jooste E, Zhang Y, Emala CW: Rapacuronium preferentially antagonizes the function of M2 *versus* M3 muscarinic receptors in guinea pig airway smooth muscle. *ANESTHESIOLOGY* 2005; 102:117-24
20. Udem BJ, Myers AC, Barthlow H, Weinreich D: Vagal innervation of guinea pig bronchial smooth muscle. *J Appl Physiol* 1990; 69:1336-46
21. Ellis JL, Udem BJ: Non-adrenergic, non-cholinergic contractions in the electrically field stimulated guinea-pig trachea. *Br J Pharmacol* 1990; 101:875-80
22. Dowrie RH, Ebling WF, Mandema JW, Stanski DR: High-performance liquid chromatographic assay of propofol in human and rat plasma and fourteen rat tissues using electrochemical detection. *J Chromatogr B Biomed Appl* 1996; 678:279-88
23. Hirota K, Ebina T, Sato T, Ishihara H, Matsuki A: Is total body weight an appropriate predictor for propofol maintenance dose? *Acta Anaesthesiol Scand* 1999; 43:842-4
24. Hoymork SC, Raeder J: Why do women wake up faster than men from propofol anaesthesia? *Br J Anaesth* 2005; 95:627-33
25. Handa-Tsutsui F, Kodaka M: Propofol concentration requirement for laryngeal mask airway insertion was highest with the ProSeal, next highest with the Fastrach, and lowest with the Classic type, with target-controlled infusion. *J Clin Anesth* 2005; 17:344-7
26. Luo W, Li YH, Yang JJ, Tian J, Xu JG: Cerebrospinal fluid and plasma propofol concentration during total intravenous anaesthesia of patients undergoing elective intracranial tumor removal. *J Zhejiang Univ Sci B* 2005; 6:865-8
27. Kuipers JA, Boer F, Olieman W, Burm AG, Bovill JG: First-pass lung uptake and pulmonary clearance of propofol: Assessment with a recirculatory indocyanine green pharmacokinetic model. *ANESTHESIOLOGY* 1999; 91:1780-7
28. Dawidowicz AL, Kalitynski R, Kobielski M, Pieniadz J: Influence of propofol concentration in human plasma on free fraction of the drug. *Chem Biol Interact* 2006; 159:149-55
29. Esener Z, Sarihasan B, Guven H, Ustun E: Thiopentone and etomidate concentrations in maternal and umbilical plasma, and in colostrum. *Br J Anaesth* 1992; 69:586-8
30. McLean RF, Baker AJ, Walker SE, Mazer CD, Wong BI, Harrington EM: Ketamine concentrations during cardiopulmonary bypass. *Can J Anaesth* 1996; 43:580-4
31. Cheng EY, Mazzeo AJ, Bosnjak ZJ, Coon RL, Kampine JP: Direct relaxant effects of intravenous anesthetics on airway smooth muscle. *Anesth Analg* 1996; 83:162-8
32. Ouedraogo N, Marthan R, Roux E: The effects of propofol and etomidate on airway contractility in chronically hypoxic rats. *Anesth Analg* 2003; 96:1035-41
33. Ouedraogo N, Roux E, Forestier F, Rossetti M, Savineau JP, Marthan R: Effects of intravenous anesthetics on normal and passively sensitized human isolated airway smooth muscle. *ANESTHESIOLOGY* 1998; 88:317-26
34. Belouchi NE, Roux E, Savineau JP, Marthan R: Interaction of extracellular albumin and intravenous anaesthetics, etomidate and propofol, on calcium signalling in rat airway smooth muscle cells. *Fundam Clin Pharmacol* 2000; 14:395-400
35. Hanazaki M, Jones KA, Warner DO: Effects of intravenous anesthetics on  $Ca^{2+}$  sensitivity in canine tracheal smooth muscle. *ANESTHESIOLOGY* 2000; 92:133-9
36. Kabara S, Hirota K, Hashiba E, Yoshioka H, Kudo T, Sato T, Matsuki A: Comparison of relaxant effects of propofol on methacholine-induced bronchoconstriction in dogs with and without vagotomy. *Br J Anaesth* 2001; 86:249-53
37. Brown RH, Greenberg RS, Wagner EM: Efficacy of propofol to prevent bronchoconstriction: Effects of preservative. *ANESTHESIOLOGY* 2001; 94:851-5
38. Rizzo CA, Valentine AF, Egan RW, Kreutner W, Hey JA: NK(2)-receptor mediated contraction in monkey, guinea-pig and human airway smooth muscle. *Neuropeptides* 1999; 33:27-34
39. Venugopal CS, Christopher CL, Wilson SM, Polikepahad S, Dequeant E, Holmes EP: Pharmacologic evaluation of neurokinin-2 receptor antagonists in the guinea pig respiratory tract. *Am J Vet Res* 2004; 65:984-91
40. Mukaiyama O, Morimoto K, Nosaka E, Takahashi S, Yamashita M: Involvement of enhanced neurokinin NK3 receptor expression in the severe asthma guinea pig model. *Eur J Pharmacol* 2004; 498:287-94
41. Barnes PJ: Neuropeptides and asthma. *Am Rev Respir Dis* 1991; 143:S28-32

42. Ichinose M, Nakajima N, Takahashi T, Yamauchi H, Inoue H, Takishima T: Protection against bradykinin-induced bronchoconstriction in asthmatic patients by neurokinin receptor antagonist. *Lancet* 1992; 340:1248-51
43. Taylor SM, Pare PD, Schellenberg RR: Cholinergic and nonadrenergic mechanisms in human and guinea pig airways. *J Appl Physiol* 1984; 56:958-65
44. Fuller RW, Dixon CM, Barnes PJ: Bronchoconstrictor response to inhaled capsaicin in humans. *J Appl Physiol* 1985; 58:1080-4
45. Crimi N, Palermo F, Oliveri R, Palermo B, Vancheri C, Polosa R, Mistretta A: Effect of nedocromil on bronchospasm induced by inhalation of substance P in asthmatic subjects. *Clin Allergy* 1988; 18:375-82
46. Cheung D, van der Veen H, den Hartigh J, Dijkman JH, Sterk PJ: Effects of inhaled substance P on airway responsiveness to methacholine in asthmatic subjects *in vivo*. *J Appl Physiol* 1994; 77:1325-32
47. Evans TW, Dixon CM, Clarke B, Conradson TB, Barnes PJ: Comparison of neurokinin A and substance P on cardiovascular and airway function in man. *Br J Clin Pharmacol* 1988; 25:273-5
48. Joos G, Pauwels R, van der Straeten M: Effect of inhaled substance P and neurokinin A on the airways of normal and asthmatic subjects. *Thorax* 1987; 42:779-83
49. Joos GF, De Swert KO, Pauwels RA: Airway inflammation and tachykinins: Prospects for the development of tachykinin receptor antagonists. *Eur J Pharmacol* 2001; 429: 239-50
50. Joos GF, De Swert KO, Schelfhout V, Pauwels RA: The role of neural inflammation in asthma and chronic obstructive pulmonary disease. *Ann N Y Acad Sci* 2003; 992:218-30
51. Cohen J, Burggraaf J, Schoemaker RC, Sterk PJ, Cohen AF, Diamant Z: Relationship between airway responsiveness to neurokinin A and methacholine in asthma. *Pulm Pharmacol Ther* 2005; 18:171-6
52. Joos GF, Vincken W, Louis R, Schelfhout VJ, Wang JH, Shaw MJ, Cioppa GD, Pauwels RA: Dual tachykinin NK1/NK2 antagonist DNK333 inhibits neurokinin A-induced bronchoconstriction in asthma patients. *Eur Respir J* 2004; 23:76-81
53. Schelfhout V, Louis R, Lenz W, Heyrman R, Pauwels R, Joos G: The triple neurokinin-receptor antagonist CS-003 inhibits neurokinin A-induced bronchoconstriction in patients with asthma. *Pulm Pharmacol Ther* 2006; 19:413-8

## ANESTHESIOLOGY REFLECTIONS

### Gwathmey's 1914 *Anesthesia*

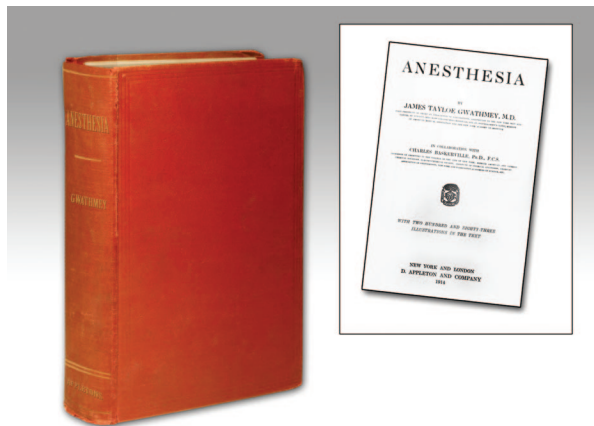

As the founder and first president of the American Association of Anesthetists, James Tayloe Gwathmey, M.D. (1862–1944), produced what many regard as America's first truly comprehensive textbook on anesthesia. Yes, the gilt-lettered, red-covered first edition of his *Anesthesia* was lavishly illustrated (above, courtesy of the Wood Library-Museum). However, it was Gwathmey's collaboration with renowned chemist Charles Baskerville, Ph.D., that answered Gwathmey's plea 8 yr prior "for the scientific administration of anesthetics." Even 8 yr after its publication, the first edition of Gwathmey's *Anesthesia* was saluted by Dr. F. H. McMechan as "the most comprehensive anesthesia textbook now extant. . . ." (Copyright © the American Society of Anesthesiologists, Inc. This image appears in color in the *Anesthesiology Reflections* online collection available at [www.anesthesiology.org](http://www.anesthesiology.org).)

George S. Bause, M.D., M.P.H., Honorary Curator, ASA's Wood Library-Museum of Anesthesiology, Park Ridge, Illinois, and Clinical Associate Professor, Case Western Reserve University, Cleveland, Ohio. [UJYC@aol.com](mailto:UJYC@aol.com).
